# Supplementary material for: Use of Cannabis and Other Pain Treatments Among Adults With Chronic Pain in US States With Medical Cannabis Programs
Source: PubMed Central journal article supplement (PMC9857553; doi:10.1001/jamanetworkopen.2022.49797), 2023-01-06
Supplement: jamanetwopen-e2249797-s001.pdf [file jamanetwopen-e2249797-s001.pdf]

## Supplemental Online Content

Bicket MC, Stone EM, McGinty EE. Use of cannabis and other pain treatments among adults with chronic pain in US states with medical cannabis programs. *JAMA Netw Open*. 2023;6(1):e2249797. doi:10.1001/jamanetworkopen.2022.49797

**eTable 1.** List of States and Districts with Active Medical Cannabis Programs as of March 2022

**eTable 2.** List of Survey Questions

This supplemental material has been provided by the authors to give readers additional information about their work.

**eTable 1.** List of States and Districts with Active Medical Cannabis Programs as of March 2022

Alaska  
Alabama  
Arkansas  
Arizona  
California  
Colorado  
Connecticut  
District of Columbia  
Delaware  
Florida  
Hawaii  
Illinois  
Louisiana  
Massachusetts  
Maryland  
Maine  
Michigan  
Minnesota  
Missouri  
Montana  
North Dakota  
New Hampshire  
New Jersey  
New Mexico  
Nevada  
New York  
Oregon  
Ohio  
Oklahoma  
Pennsylvania  
Rhode Island  
South Dakota  
Utah  
Virginia  
Vermont  
Washington  
West Virginia

**eTable 2.** List of Survey Questions

| Question                                                                                                    | Response options                                                                                                                                                                                                                                                                                                                                                                                                                                                     |
|-------------------------------------------------------------------------------------------------------------|----------------------------------------------------------------------------------------------------------------------------------------------------------------------------------------------------------------------------------------------------------------------------------------------------------------------------------------------------------------------------------------------------------------------------------------------------------------------|
| In the past 6 months, how often did you have pain? Would you say never, some days, most days, or every day? | Never<br>Some days<br>Most days<br>Every day<br>DON'T KNOW                                                                                                                                                                                                                                                                                                                                                                                                           |
| Is your pain related to cancer?                                                                             | Yes<br>No<br>DON'T KNOW                                                                                                                                                                                                                                                                                                                                                                                                                                              |
| Do you still reside in [INSERT [STATE]]?                                                                    | Yes<br>No<br>DON'T KNOW                                                                                                                                                                                                                                                                                                                                                                                                                                              |
| If no, what state do you reside in?                                                                         | DON'T KNOW<br>Alaska<br>Alabama<br>Arkansas<br>Arizona<br>California<br>Colorado<br>Connecticut<br>District of Columbia<br>Delaware<br>Florida<br>Georgia<br>Hawaii<br>Iowa<br>Idaho<br>Illinois<br>Indiana<br>Kansas<br>Kentucky<br>Louisiana<br>Massachusetts<br>Maryland<br>Maine<br>Michigan<br>Minnesota<br>Missouri<br>Mississippi<br>Montana<br>North Carolina<br>North Dakota<br>Nebraska<br>New Hampshire<br>New Jersey<br>New Mexico<br>Nevada<br>New York |

|                                                                                                                                                                                                                                                                                                                                                                                                                                                                                                  |                                                                                                                                                                                                          |
|--------------------------------------------------------------------------------------------------------------------------------------------------------------------------------------------------------------------------------------------------------------------------------------------------------------------------------------------------------------------------------------------------------------------------------------------------------------------------------------------------|----------------------------------------------------------------------------------------------------------------------------------------------------------------------------------------------------------|
|                                                                                                                                                                                                                                                                                                                                                                                                                                                                                                  | Oregon<br>Ohio<br>Oklahoma<br>Pennsylvania<br>Rhode Island<br>South Carolina<br>South Dakota<br>Tennessee<br>Texas<br>Utah<br>Virginia<br>Vermont<br>Washington<br>Wisconsin<br>West Virginia<br>Wyoming |
| Would you be willing to complete this survey?                                                                                                                                                                                                                                                                                                                                                                                                                                                    | I agree to participate<br>I do not agree to participate<br>DON'T KNOW                                                                                                                                    |
| Have you ever used cannabis to manage your chronic pain?                                                                                                                                                                                                                                                                                                                                                                                                                                         | Yes<br>No<br>DON'T KNOW                                                                                                                                                                                  |
| Have you used cannabis to manage your chronic pain in the past 12 months?                                                                                                                                                                                                                                                                                                                                                                                                                        | Yes<br>No<br>DON'T KNOW                                                                                                                                                                                  |
| Have you used cannabis to manage your chronic pain in the past 30 days?                                                                                                                                                                                                                                                                                                                                                                                                                          | Yes<br>No<br>DON'T KNOW                                                                                                                                                                                  |
| Have you ever used any of the following non-medication approaches to manage your chronic pain?<br><br>Items:<br>Surgery<br>Injections<br>Nerve block<br>Physical therapy<br>Yoga<br>Massage<br>Meditation<br>Cognitive behavioral therapy<br>Acupuncture<br>Heat, hot packs, or other heat therapies<br>Cold, cryotherapy, or other cold therapies<br>Biofeedback or relaxation therapy<br>Transcutaneous electrical nerve stimulation (TENS)<br>Acupressure<br>Exercise<br>Aquatic/pool therapy | For each item:<br><br>Yes, in the past 30 days<br>Yes, in the past 12 months<br>Yes, not in the past 12 months<br>No                                                                                     |

|                                                                                                                                                                                                                                                                                                                                                                                                                                                                                                                                                                                                                                                                                                                 |                                                                                                         |
|-----------------------------------------------------------------------------------------------------------------------------------------------------------------------------------------------------------------------------------------------------------------------------------------------------------------------------------------------------------------------------------------------------------------------------------------------------------------------------------------------------------------------------------------------------------------------------------------------------------------------------------------------------------------------------------------------------------------|---------------------------------------------------------------------------------------------------------|
| <p>Chiropractic therapy<br/> Cupping therapy<br/> Other non-medication strategy to manage chronic pain (please describe)</p>                                                                                                                                                                                                                                                                                                                                                                                                                                                                                                                                                                                    |                                                                                                         |
| <p>Has your use of cannabis to manage your chronic pain changed your use of any of the below?</p> <p>Items [For each treatment populated in prior question]:<br/> Surgery<br/> Injections<br/> Nerve block<br/> Physical therapy<br/> Yoga<br/> Massage<br/> Meditation<br/> Cognitive behavioral therapy<br/> Acupuncture<br/> Heat, hot packs, or other heat therapies<br/> Cold, cryotherapy, or other cold therapies<br/> Biofeedback or relaxation therapy<br/> Transcutaneous electrical nerve stimulation (TENS)<br/> Acupressure<br/> Exercise<br/> Aquatic/pool therapy<br/> Chiropractic therapy<br/> Cupping therapy<br/> Other non-medication strategy to manage chronic pain (please describe)</p> | <p>Yes, increased use of [item]<br/> Yes, decreased use of [item]<br/> No<br/> Prefer not to answer</p> |
