# Supplementary material for: Use of Cannabis and Other Pain Treatments Among Adults With Chronic Pain in US States With Medical Cannabis Programs
Source: PubMed Central journal article supplement (PMC9857553; doi:10.1001/jamanetworkopen.2022.49797), 2023-01-06
Supplement: jamanetwopen-e2249797-s002.pdf [file jamanetwopen-e2249797-s002.pdf]

## Data Sharing Statement

Bicket. Use of Cannabis and Other Pain Treatments Among Adults With Chronic Pain in US States With Medical Cannabis Programs. *JAMA Netw Open*. Published January 06, 2023. doi:10.1001/jamanetworkopen.2022.49797

### Data

**Data available:** No

### Additional Information

**Explanation for why data not available:** The data will not be shared per the data use agreement with NORC, which only allows access by the study team.
